# Supplementary material
Source: PubMed Central journal article supplement (PMC3459140)
Supplement: NIHMS396674-supplement-02.pdf [file NIHMS396674-supplement-02.pdf]

## Supplemental data

### Detection of Hydroxyapatite in the Calcified Cardiovascular Tissues

Jae Sam Lee<sup>1</sup>, Joel D. Morrisett<sup>2</sup>, Ching-Hsuan Tung<sup>1\*</sup>

<sup>1</sup>Department of Translational Imaging, The Methodist Hospital Research Institute, Weill Cornell Medical College, Houston, TX

<sup>2</sup>Department of Medicine, Atherosclerosis and Vascular Medicine Section, Methodist DeBakey Heart Center, Baylor College of Medicine, Houston, TX

\*Correspondence to  
Ching H. Tung,  
Department of Translational Imaging,  
The Methodist Hospital Research Institute,  
6565 Fannin Street, #B5-009,  
Houston, TX 77030.  
E-mail: [ctung@tmhs.org](mailto:ctung@tmhs.org)

**Supplemental Figures**

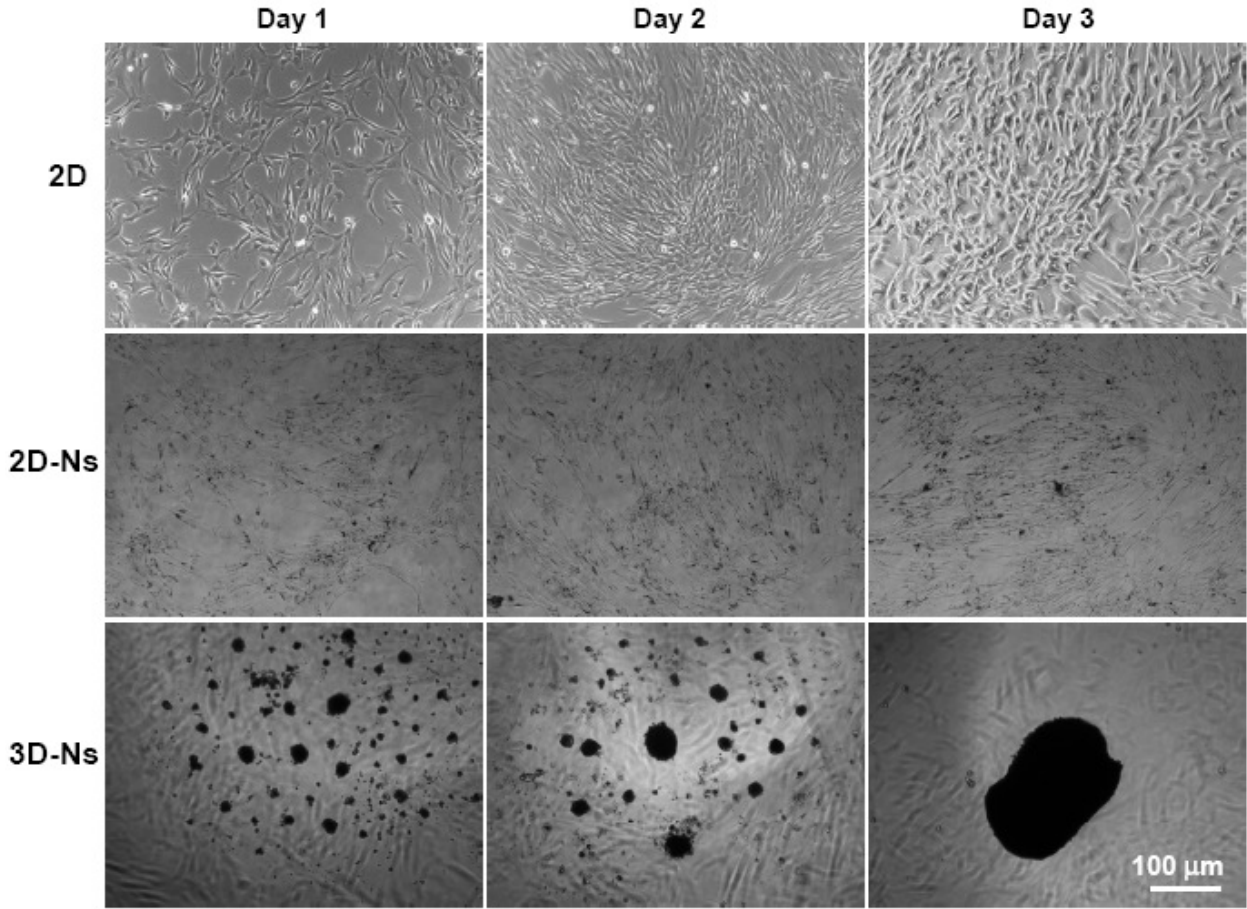

**Supplemental Figure I.** Morphological changes of VSMCs during mineralization. Cells were incubated under control media (CM) for 3 days. Developed mineral layers from 2D, 2D-Ns, and 3D-Ns cultures observed by a light microscopy.

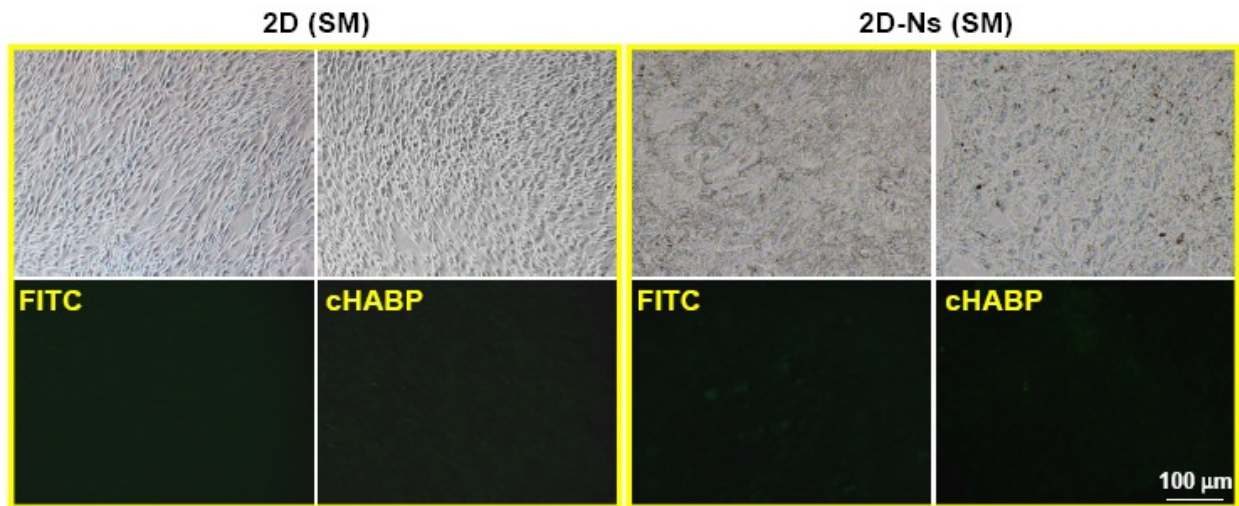

**Supplemental Figure II.** HA calcification of VSMCs induced by extrinsic stimuli. Cells cultured in 2D SM or 2D-Ns SM for 4 d were stained with FITC or cHABP and observed by a fluorescent microscopy, bright field (top) and fluorescence images (bottom) from mineral layers of VSMCs.

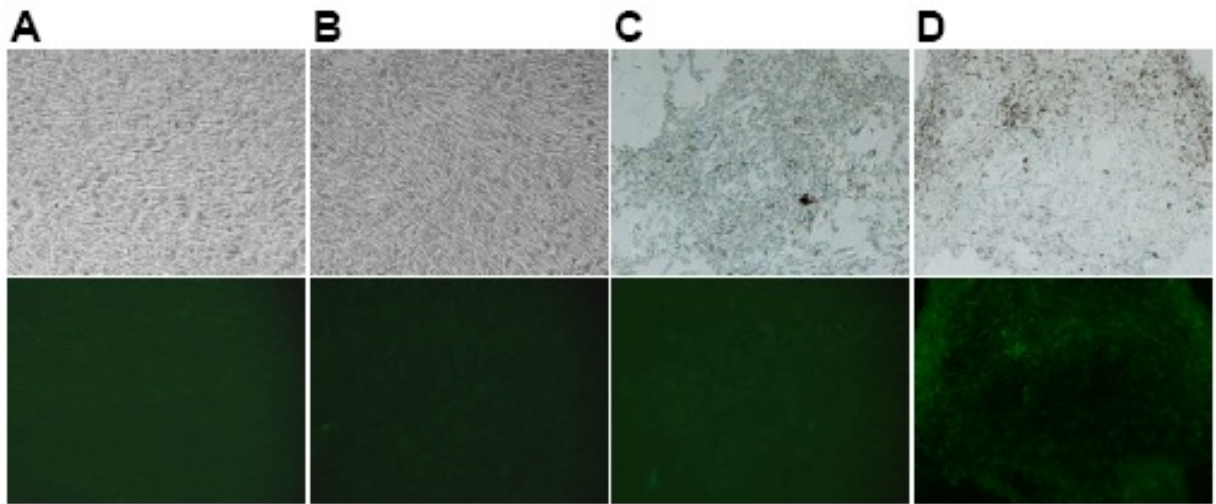

**Supplemental Figure III.** HA calcification of VSMCs induced by extrinsic stimuli. For corroborative visualization of the extent of HA calcification, cells cultured in CM or SM for 4 d were stained with HABP-19 and observed by a fluorescent microscopy. (A-B) Bright field (top) and fluorescence images (bottom) from mineral layers of VSMCs stained with HABP-19. Cells were cultured in 2D CM (A) or 2D SM (B). (C-D) Calcium deposition of VSMCs induced by 2D-Ns CM (C) or 2D-Ns SM (D) were stained with HABP-19.

## **Supplemental Movie Legend**

**Supplemental Movie I.** A 3 dimensional  $\mu$ CT movie of surgically excised aortic valves. Cleaved aortic valves were incubated in the solution of PBS (1), FITC (2), cHABP-19 (3), or HABP-19 (4) for 1 h and then further incubated in PBS for 24 h.  $\mu$ CT imaging was performed at medium resolution and real time images were reconstructed. White color in the  $\mu$ CT images represents calcium depositions on the aortic valve surfaces. Scanner was operated in a 3 D volume imaging acquisition mode. Aortic valves were aligned at the center of the scanner FOV for subsequent imaging.  $\mu$ CT was acquired in approximately 3 min, and concurrent image reconstruction was achieved using a COBRA (Siemens). Invenon Research Workplace software (Siemens) was used to view and adjust imaging.
